1 A precautionary solution to estimation bias in shaping safe harvest boundaries

2

3 Daisuke Goto<sup>1,\*</sup>, Jennifer A. Devine<sup>1,4</sup>, Ibrahim Umar<sup>1</sup>, Simon H. Fischer<sup>2</sup>, José A. A. De

4 Oliveira<sup>2</sup>, Daniel Howell<sup>1</sup>, Ernesto Jardim<sup>3,5</sup>, Iago Mosqueira<sup>3,6</sup>, and Kotaro Ono<sup>1</sup>.

5

6 <sup>1</sup>Institute of Marine Research/Havforskningsinstituttet, Postboks 1870 Nordnes, 5817 Bergen,

7 Norway

8 <sup>2</sup>The Centre for Environment, Fisheries and Aquaculture Science (Cefas), Lowestoft Laboratory,

9 Pakefield Road, Lowestoft, Suffolk NR33 0HT, UK

10 <sup>3</sup>European Commission, DG Joint Research Center, Directorate D – Sustainable Resources, Unit

11 D.02 Water and Marine Resources, Via Enrico Fermi 2749 21027, Ispra, VA, Italy

12 Present address:

13 <sup>4</sup>National Institute of Water & Atmospheric Research, 217 Akersten Street, Nelson 7040, New

14 Zealand

15 <sup>5</sup>Marine Stewardship Council, Marine House, 1 Snow Hill, London, EC1A 2DH, UK

16 <sup>6</sup>Wageningen Marine Research, PO Box 68, 1970AB, IJmuiden, The Netherlands

17 \*Corresponding author: [daisuke.goto2@gmail.com](mailto:daisuke.goto2@gmail.com)

18

19 **Abstract**

20 1. Imperfect knowledge of social–ecological systems can obscure predictability of resource  
21 fluctuation and, in turn, lead to erroneous risk assessments and delayed management actions.

22 Systematic error in population status such as persistent overestimation of abundance is a  
23 pervasive conservation problem and has plagued assessments of commercial exploitation of  
24 marine species, threatening its sustainability.

25 2. Using North Sea saithe (*Pollachius virens*)—a demersal (bottom-water) predatory fish—as a  
26 real-world case study, we illustrate a precautionary approach to diagnose robustness of harvest  
27 rules to persistent estimation bias (overestimated stock abundance and underestimated fishing  
28 mortality rate) and to develop alternative protective measures that minimize population depletion  
29 (quasi-extinction) risk by propagating known sources of uncertainty (process, observation, and  
30 implementation) through closed-loop simulation of resource–management feedback systems  
31 (management strategy evaluation, MSE).

32 3. Analyses showed that the harvest rules set for saithe are robust to a moderate amount (10–  
33 30%) of estimation bias. More severe bias sets overly optimistic catch limits and promotes  
34 overexploitation only in the short term; unacceptably high quasi-extinction risks, however, result  
35 primarily from progressively amplified amplitudes of catch fluctuation. Although these  
36 undesirable outcomes were, to some extent, mitigated by applying a policy tool to suppress catch  
37 fluctuation, this tool falls short of being an effective measure to achieve management goals.

38 4. More consistent performance of management measures was achieved by developing and  
39 applying more precautionary harvest rules through MSE by explicitly accounting for bias. When  
40 bias became more severe, raising threshold abundance (by 8–24%) that triggers management  
41 actions and lowering target exploitation rate (by 6–29%) would not only safeguard against

42 overexploitation and depletion but also provide catch stability (less disruption in fishing  
43 operations).

44 5. We show that the precautionary approach to risk management through MSE offers a powerful  
45 tool to set safe harvest boundaries when assessments are persistently biased. Given challenges in  
46 identifying the sources, we suggest bias be routinely evaluated through MSE, and alternative  
47 measures be developed to set catch limits when needed. By explicitly accounting for key sources  
48 of uncertainty in managing commercial exploitation, our proposed approach ensures effective  
49 conservation and sustainable exploitation of living marine resources even under profound  
50 uncertainty.

51 **Key words:** *environmental stochasticity, decision making, measurement error, risk analysis,*  
52 *extinction, management procedure, state-space models*

## 53 **1. INTRODUCTION**

54 Managers and policymakers face trade-offs in sustainably managing extractive use of living  
55 marine resources while effectively conserving biodiversity under the precautionary principle  
56 (FAO 1996; Hilborn et al. 2001). Imperfect knowledge of social–ecological systems, however,  
57 impedes the decision making. Scientific uncertainty of current population status can obscure  
58 assessment of decline or extinction threats (Ripa & Lundberg 1996; Ovaskainen & Meerson  
59 2010). Lack of certainty in socioeconomic dynamics (promoting noncompliance and inertia) may  
60 also reduce the efficacy of management measures applied (Hilborn et al. 2001; Beddington et al.  
61 2007). We must, thus, account for key sources of uncertainty to accurately assess  
62 overexploitation risk (Regan et al. 2005) and recovery potential (Memarzadeh et al. 2019) and  
63 set conservation priorities if we were to achieve internationally agreed targets such as  
64 Sustainable Development Goal 14 (UN 2015) and Aichi Biodiversity Target 6 (CBD 2010).

65 In commercial capture fisheries, assessments of current population status provide a scientific  
66 basis for setting a threshold for safe harvest to prevent the decline of fish stocks by taking  
67 precautionary measures, where necessary. This approach may include the use of biological  
68 thresholds such as the population abundance that produces maximum sustainable yield ( $B_{MSY}$ ,  
69 Beddington et al. 2007). The harvest of wild populations is commonly managed by applying  
70 decision rules based on such predefined thresholds (reference points) to set a catch limit for the  
71 year (Beddington et al. 2007). Accurate population assessments, thus, contribute to successful  
72 implementation of management measures to sustain long-term commercial exploitation of  
73 marine animals (Hilborn et al. 2020). Scientific uncertainty in assessments (data and models),  
74 however, has posed a multitude of challenges (Patterson et al. 2001; Sethi 2010). If population  
75 abundance is overestimated, for example, resulting overly optimistic catch advice or rebuilding  
76 plans will deplete the population, thereby threatening the sustainability of fisheries that depend  
77 on it (Walters & Maguire 1996; Memarzadeh et al. 2019). Overestimated abundance and  
78 underestimated exploitation rate (resulting heightened extinction risk) have led to some historical  
79 collapses of oceanic predators (Walters & Maguire 1996; Charles 1998).

80 Systematic errors in perceived population status have plagued assessments of exploited marine  
81 species (ICES 2020a) and likely contributed to overharvest and depletion including stocks that  
82 are considered well-managed (Brooks & Legault 2016; Wiedenmann & Jensen 2018).  
83 Inconsistency across assessments (such as persistent overestimation of abundance) detected  
84 retrospectively (known as “retrospective patterns”) has led to the rejection of assessments (Punt  
85 et al. 2020). Although past research has proposed solutions to the retrospective problems,  
86 applying these solutions remains a challenge because bias could originate from multiple sources  
87 (Mohn 1999; Hurtado-Ferro et al. 2015; Brooks & Legault 2016). Incomplete knowledge of the

88 causes behind retrospective patterns a priori may lead to incorrect application of the tools,  
89 inadvertently exacerbating the problems by amplifying overharvest and depletion risks (Mohn  
90 1999; Brooks & Legault 2016). Given serious ecological and socioeconomic implications for  
91 getting it wrong, we urgently need a procedure that provides practical guidance for explicitly  
92 evaluating robustness of management strategies and designing alternative protective measures to  
93 inform decision making to safely harvest marine resources under uncertainty (Brooks & Legault  
94 2016; Punt et al. 2020).

95 Here, we illustrate how closed-loop simulation of resource–management systems (management  
96 strategy evaluation) can help prevent retrospective patterns from derailing effective management  
97 of exploited marine populations under known sources of uncertainty. Management strategy  
98 evaluation (MSE) is a flexible decision-support tool frequently used in fisheries (Butterworth &  
99 Punt 1999) and has increasingly been adopted for conservation planning of imperiled species in  
100 marine and terrestrial systems (Milner-Gulland et al. 2001; Bunnfeld et al. 2011). This tool is  
101 designed to evaluate the performance of candidate policy instruments through forward  
102 simulations of feedback (learning from implementation and new observation) between natural  
103 resources and management systems (Punt et al. 2016). MSE can also assess consequences of  
104 likely sources of bias in assessments (Szuwalski et al. 2017; Hordyk et al. 2019). Managing with  
105 persistent overestimates of population abundance may not only set overly optimistic catch limits  
106 (Hordyk et al. 2019) but also amplify the magnitude of catch fluctuation (Deroba 2014), an  
107 undesirable outcome for harvesters and seafood processors. In this study, we make use of the  
108 MSE framework for the North Sea population of saithe (*Pollachius virens*) (ICES 2019a), a  
109 demersal (bottom-water) predatory fish harvested commercially by more than a dozen European  
110 nations, as a real-world case study. We illustrate a 2-step simulation approach to diagnose

111 retrospective problems and to design robust harvest policies by explicitly accounting for process,  
112 observation, and implementation errors under scenarios of estimation bias (inaccuracy and  
113 inconsistency in perceived stock abundance and fishing pressure). Specifically, we ask: 1) How  
114 robust are current management procedures to biased assessments? and 2) How precautionary do  
115 management procedures need to be to avert mismanagement?

## 116 **2. METHODS AND MATERIALS**

### 117 2.1. Management strategy evaluation framework

118 We simulated annual resource surveys and assessments to explore trade-offs in achieving  
119 conservation-oriented (minimizing risk) and harvest-oriented (maximizing yield and minimizing  
120 yield variance) goals through MSE. We used the MSE framework originally developed for  
121 commercially harvested demersal fish stocks in the North Sea through the International Council  
122 for the Exploration of the Sea (ICES 2019a) and has been adopted for other managed species in  
123 the North Atlantic including Atlantic mackerel (*Scomber scombrus*, ICES 2020b). The  
124 framework consists of submodels that simulate 1) true population and harvest dynamics at sea  
125 and observations through monitoring surveys (an operating model, OM), and 2) management  
126 processes (learning and decision), assessments based on observations from the surveys and  
127 subsequent decision making (a management procedure, MP) (Fig. 1a). We conditioned the OM  
128 on the latest (2018) assessment for North Sea saithe (ICES statistical areas: Subareas 4 and 6 and  
129 Division 3a, Fig. 1c and ICES 2018), which represents the best available information on the past  
130 (1967–2017) population and harvest dynamics, and projected 21-year (2018–2038) forecasts. We  
131 ran all simulations in R (version 3.60, R Development Core Team 2019) using the `mse` R  
132 package (<https://github.com/flr/mse>) (ICES 2019a), part of the Fisheries Library in R (FLR, Kell  
133 et. al 2007).

134 2.2. Saithe population dynamics

135 To simulate future saithe population dynamics, we used an age-structured population model  
136 that accounts for environmental stochasticity. The data sources, survey methods, and model  
137 structure have been extensively documented in ICES (2016) and ICES (2019b). Briefly, we  
138 parameterized the model with 51-year estimates of age-specific masses (g) and maturity rates  
139 (proportion of adults), and natural mortality rates (non-fishing such as starvation and diseases)  
140 assumed at a value of  $0.2 \text{ year}^{-1}$  for all ages and years. Then, we fitted the population model to  
141 time series data of commercial catch (age-aggregated biomass of German, French, and  
142 Norwegian trawlers in 2000–2017,  $t$ ) and age-specific (ages 3–8) abundance indices  
143 (International bottom trawl surveys in the third quarter, IBTS-Q3, in 1992–2017) (ICES 2018).

144 Modeled fish enter the population as 3-year-olds (recruits). We simulated density-dependent  
145 regulation of recruitment with a segmented regression (ICES 2019a) relating adult biomass to the  
146 number of recruits. Adult biomass (spawning stock biomass, SSB,  $t$ ) is the product of age-  
147 specific numbers, masses, and maturity rates. We parameterized the spawner–recruit model by  
148 fitting it to the 1998–2017 data. To account for environmental stochasticity in density-  
149 dependency of recruitment, we first used a kernel density function to smooth the resulting  
150 distribution of residuals from the fitted regression. Then, we resampled residuals (with  
151 replacement) from the distribution and applied to model outputs to generate recruits every  
152 simulation year (Appendix S1a,b); this process was repeated independently for each replicate.  
153 Preliminary analyses showed little evidence of temporal autocorrelation in recruitment  
154 (Appendix S1c).

155 We simulated the population dynamics of 4-year-olds and older as

156 
$$\log N_{a,y} = \log N_{a-1,y-1} - F_{a-1,y-1} - M_{a-1,y-1} + \eta_{a,y} \quad (1a)$$

157 
$$\log N_{a,y} = \log(N_{a-1,y-1} e^{-F_{a-1,y-1} - M_{a-1,y-1}} + N_{a,y-1} e^{-F_{a,y-1} - M_{a,y-1}}) + \eta_{a,y} \quad (1b)$$

158 
$$\log F_{a,y} = \log F_{a-1,y-1} + \zeta_{a,y} \quad (1c)$$

159 where  $N_{a,y}$ ,  $F_{a,y}$ , and  $M_{a,y}$  are  $a$ -year-old numbers, fishing mortality rates, and natural mortality  
 160 rates in year  $y$ , and  $\eta$  and  $\zeta$  are normally distributed variables, reflecting measurement errors  
 161 (Nielsen & Berg 2014). Historical surveys indicate that 10-year-olds and older are relatively  
 162 uncommon, and we simulated them as a dynamic aggregate pool ( $N_A$ ,  $F_A$ , and  $M_A$ ). To account  
 163 for process uncertainty (year-to-year variability in survival rate), we generated 1000 realizations  
 164 of stochastic populations using the variance-covariance matrix of estimable parameters (age-  
 165 specific numbers and fishing mortality rates) taken from the 2018 assessment (Appendix S2a,  
 166 ICES 2019b). We derived a set of mean age-specific masses, maturity rates, and fishing gear  
 167 selectivity by randomly selecting a year (with replacement) from the 2008–2017 data; this  
 168 process was repeated independently for each replicate every simulation year to account for  
 169 environmental stochasticity.

170 **2.3. Monitoring and catch surveys**

171 We simulated future annual monitoring of the population and harvest (which are subject to  
 172 error and bias) by adding observation error to simulated-true survey indices and age-specific  
 173 catch computed from the population OM. In forecasting, we assumed the model is fixed (life-  
 174 history parameters such as maturity rates are time-invariant). We simulated deviances to the  
 175 observed survey index (IBTS-Q3) using the variance-covariance matrix for the survey index to  
 176 account for observation error correlated between ages (Appendix S3a). Survey observations ( $I$ )  
 177 are generated as:

178 
$$I_{a,y} = q_a N_{a,y} e^{-t_a Z_{a,y}} e^{\varepsilon_{a,y}} \quad (2a)$$

179 
$$\varepsilon_{a,y} \sim N(0, \Sigma_I) \quad (2b)$$



180 where  $N_{a,y}$  and  $Z_{a,y}$  are  $a$ -year-old numbers and total ( $F + M$ ) mortality rates in year  $y$  from the  
181 population OM;  $q_a$  are  $a$ -year-old survey catchabilities for the survey;  $t$  is the timing of the  
182 annual survey (0.575 for IBTS-Q3).  $\varepsilon_{a,y}$  represents multivariate normally distributed errors with  
183 mean zero and standard deviation  $\Sigma$  defined by the variance-covariance matrix between ages  
184 within years (ICES 2019b). Observation error is included on age-specific abundance indices as  
185 multiplicative lognormal error (Appendix S2b).

186 We simulated uncertainty in reported catch by computing a commercial catch index (or  
187 exploitable biomass index) generated from the population OM (Appendix S3b) as:

$$188 \quad I_y = q \left[ \sum_a S_{a,y} w_{a,y}^c N_{a,y} e^{-0.5 Z_{a,y}} \right] e^{\varepsilon_y} \quad (3a)$$

$$189 \quad S_{a,y} = K_{a,y} / \sum_a K_{a,y} \quad (3b)$$

$$190 \quad \varepsilon_y \sim N(0, \sigma^2) \quad (3c)$$

191 where  $N_{a,y}$  and  $Z_{a,y}$  are as above;  $q$  is the catchability of the commercial catch index;  $w_{a,y}^c$  are  $a$ -  
192 year-old catch masses in year  $y$ ; 0.5 indicates projection to mid-year;  $S$  is the relative  $F$  for  $a$ -  
193 year-olds in year  $y$ ; and  $\varepsilon_y$  is a normally distributed error with mean zero and standard deviation  
194  $\sigma$  in year  $y$  (Appendix S2c).

#### 195 2.4. Management procedure

196 The MP simulates decision making by managers based on perceived current stock status and  
197 model-based harvest rules (Fig. 1a); the current status is assessed annually by fitting an  
198 estimation model (EM) to the time series (past plus most recent) data passed on from the  
199 observation model (survey and catch indices) before provision of catch advice in May. In this  
200 study, we used the State-space Assessment Model (Nielsen & Berg 2014) as an EM and harvest  
201 rules set for saithe (ICES 2019a); model settings and forecast assumptions are fully described in  
202 ICES (2019b). Under the harvest rules, the following year's catch limit is the product of target

203 exploitation rate ( $F_{target}$ ) and stock abundance ( $t$ ) when the estimated SSB in the current  
204 assessment year (terminal year) remains above a fixed threshold ( $B_{trigger}$ ) (Fig. 1b). These 2  
205 parameters of the decision model are designed to prevent overharvesting by accounting for  
206 uncertainty in population and harvest dynamics (Rindorf et al. 2016). When the SSB falls below  
207  $B_{trigger}$ , exploitation rate is adjusted to  $F_{target}$  scaled to the proportion of SSB relative to  $B_{trigger}$   
208 (Fig. 1b), thereby allowing the population to rebuild (adaptive harvesting).

## 209 2.5. Population and management measure performances

210 We computed conservation-oriented (median SSB and risk) and harvest-oriented (median  
211 catch and interannual catch variability, ICV) metrics from 1000 realizations of annual  
212 assessments to evaluate performance of the harvest rules applied. We chose the number of  
213 replicates based on the stability of risk (ICES 2019a). Risk is defined as the maximum annual  
214 probability of SSB falling below a limit threshold,  $B_{lim}$  (probability of quasi-extinction, Fig. 1b),  
215 consistent with previous analyses (ICES 2019c).  $B_{lim}$  is a spawner abundance below which  
216 reproductive capacity of the population is expected to decline (Rindorf et al. 2016). We  
217 computed the risk based on the proportion of 1000 simulations with annual estimates of SSB <  
218  $B_{lim}$ . We estimated  $B_{lim}$  using the Eqsim R package (<https://github.com/ices-tools-prod/msy>);  $B_{lim}$   
219 is set to 107,297 t for saithe (Fig. 1b, ICES 2019a). We computed ICV (a percentage change in  
220 catch limits) as

$$221 \quad ICV_y = \frac{C_{y+1} - C_y}{C_y} \times 100 \quad (4)$$

222 where  $C_{y+1}$  and  $C_y$  are projected catches in year  $y+1$  and  $y$  (respectively).

223 We computed Mohn's  $\rho$ , which indicates the degree of inconsistency (bias) between  
224 subsequent assessments ("retrospective pattern", Mohn 1999), and relative error (proportional  
225 deviation between the population OM and EM) for SSB and fishing mortality rate (mean  $F$ ,

226 which is computed from age-specific fishing mortality rates of 4- to 7- year-olds) to evaluate the  
227 performance of annual assessments. We computed  $\rho$  as mean relative bias with a 5-year moving  
228 window (“peel”) for the forecasting period in 2027–2038 as;

$$229 \quad \rho = \frac{1}{5} \sum_{i=1}^5 \left( \frac{\hat{\theta}_{T-i}^{R_i} - \hat{\theta}_{T-i}}{\hat{\theta}_{T-i}} \right) \quad (5)$$

230 where  $\hat{\theta}_{T-i}^{R_i}$  is an estimate of SSB or mean  $F$  in the terminal year from the EM,  $T$ , with the last  $i$   
231 years of data removed (“peeled”), and  $\hat{\theta}_{T-i}$  is the estimate for year  $T-i$ , with all data included  
232 (Brooks & Legault 2016).

## 233 2.6. Estimation bias scenarios

234 To evaluate how managing with persistent estimation bias degrades performance of harvest  
235 rules and, in turn, potential to achieve management goals, we simulated scenarios of bias in  
236 perceived spawner abundance and fishing mortality rate in annual assessments. Although bias  
237 can emerge in both directions (over- and under-estimation), they have asymmetric implications  
238 for conservation and harvest decision making by managers. In this study, we analyzed 11  
239 scenarios that can cause severe conservation issues for exploited species, SSB overestimation  
240 and mean  $F$  underestimation. Specifically, we added a positive bias (+0%/baseline, +10%,  
241 +20%, +30, +40%, and +50% per year) to age-specific numbers or a negative bias (–  
242 0%/baseline, –10%, –20%, –30, –40%, and –50% per year) to age-specific fishing mortality rates  
243 in the terminal year of annual assessments.

244 We considered three harvest rules evaluated for saithe in previous analyses (Fig. 1b, ICES  
245 2019c); 2 rules (HCR-A+D and HCR-A1+D) with harvest policies of interannual catch quota  
246 flexibility and suppressing short-term catch fluctuation (hereafter stability constraint) and 1 rule  
247 without (HCR-A). For simplicity, we introduced interannual catch quota flexibility (also known

248 as “banking and borrowing”, ICES 2019a) by simulating a scenario of over- and under-  
249 harvesting by a fixed proportion (10%) in alternate years (for example, 10% of catch quota in  
250 year 1 is transferred to catch quota in year 2, and so on). In effect, this scenario can act like  
251 implementation error. Stability constraints are designed to suppress year-to-year variability in  
252 projected catch to  $\leq 25\%$  upward and to  $\leq 20\%$  downward (moderate) under HCR-A+D, or to  $\leq$   
253 15% in both directions (strict) under HCR-A1+D. By running these scenarios, we evaluated how  
254 effective the policy tool designed to provide stable and predictable catch forecasts is when the  
255 assessments are biased. For consistency, we used the same decision model parameter values as in  
256 ICES (2019a) in all analyses (HCR-A:  $B_{trigger} = 250,000$  t and  $F_{target} = 0.35$ ; HCR-A+D:  $B_{trigger} =$   
257  $230,000$  t and  $F_{target} = 0.37$ ; HCR-A1+D:  $B_{trigger} = 230,000$  t and  $F_{target} = 0.36$ , Fig. 1b, ICES  
258 2019a). We analyzed all scenarios based on the performance metrics (median SSB, risk, median  
259 catch, and ICV) from 1000 realizations of short-term (years 1–5) and long-term (years 11–20)  
260 projections.

## 261 2.7. Developing robust management measures

262 To evaluate how precautionary the harvest rules need to be to minimize disruption in catch  
263 advice provisioning when the assessment is biased, we explored alternative rules by optimizing  
264 the 2 parameters of the decision model ( $B_{trigger}$  and  $F_{target}$ ) to project catch limits under the same  
265 bias scenarios (overestimated SSB or underestimated mean  $F$  by 10–50%) through MSE.  
266 Because this is a computationally intensive procedure, we explored select candidate  
267 combinations (192 per scenario or 1920 unique runs in total) using HCR-A to illustrate our  
268 proposed approach. We conducted a restricted grid search in parameter space of  $B_{trigger}$  (210,000  
269 to 320,000 t with 10,000 t increments) and  $F_{target}$  (0.24 to 0.39 with 0.01 increments). We  
270 computed median catch limits and risk from 1000 realizations of 21-year simulations. For

271 consistency, we used the same precautionary criterion for optimizing the parameter sets by  
272 maximizing median catch limits while maintaining long-term risk  $\leq 0.05$  (ICES 2019c).

### 273 **3. RESULTS**

#### 274 3.1. Estimation errors under the baseline scenario

275 Analyses on the baseline scenario forecasts showed that process and observation errors  
276 introduced minor inaccuracy (relative error =  $\sim -0.02\%$ ) and inconsistency (Mohn's  $\rho = \sim -0.002$ )  
277 in annual estimates of SSB and mean  $F$  with the EM under all the harvest rules (Table 1).

278 Implementation error with stability constraints amplified inconsistency but did not influence  
279 inaccuracy except for mean  $F$  under the strict constraint in which the EM failed to detect an  
280 increase (Table 1). Mean  $\rho$  for SSB or mean  $F$  did not correlate strongly with relative errors  
281 (correlation coefficient  $r = \sim 0.01$  and  $\sim 0.008$ , respectively) under any of the harvest rules.

#### 282 3.2. Performance of harvest rules with biased estimates

283 Overall, all harvest rules were more robust to bias in estimated mean  $F$  than SSB. An  
284 increasing amount (10% to 50%) of bias in the estimates was projected to increase median catch,  
285 reduce SSB, and, in turn, increase risk in the short term (Fig. 2). Without accounting for  
286 implementation error or constraining year-to-year catch variability (HCR-A), bias in SSB  
287 estimates led to as much as 18% more catch, 14% less SSB, and nearly 3.0x higher risk than bias  
288 in mean  $F$  estimates (Fig. 2a). Although mean ICV moderately increased with bias in SSB  
289 estimates, the distribution was highly skewed; by contrast, ICV declined with increasing bias in  
290 mean  $F$  estimates (Fig. 2a).

291 When accounting for implementation error and applying stability constraints (HCR-A+D and  
292 HCR-A1+D), similar short-term patterns emerged, except that catch increased less with biased  
293 SSB estimates (Fig. 2b,c). By contrast, ICV increased much more with biased estimates of SSB

294 and mean  $F$  (up to 3.8x and 44.0x, respectively), further increasing risk (up to 1.6x and 2.8x,  
295 respectively), under the moderate constraint than under no constraint (Fig. 2b). Under the strict  
296 constraint, the distribution of ICV became less skewed, and mean ICV became less responsive to  
297 increasing bias, lowering risk by as much as ~15% (Fig. 2c).

298 In the long-term, although median catch became less responsive (declined by less than 5%) to  
299 increasing bias in estimated SSB and mean  $F$ , ICV became more variable (as much as ~1.4x the  
300 short term), reducing SSB and, in turn, increasing risk 12.9- and 8.9- fold under HCR-A  
301 (respectively, Fig. 3a). To quantify more precisely how robust the harvest rule is to bias, we ran  
302 additional simulations with 1% increments (+10% to +20% for SSB and -20% to -30% for mean  
303  $F$ ). The harvest rule was not precautionary when more than +18% bias in SSB estimates and -  
304 24% bias in mean  $F$  estimates were introduced (Appendix S4).

305 With implementation error and stability constraints, long-term relative responses of median  
306 catch and SSB to increasing bias in SSB and mean  $F$  estimates were similar to those under HCR-  
307 A, but ICV and risk increased less (Fig. 3b,c). Although absolute values of ICV and risk were  
308 higher under HCR-A+D and HCR-A1+D owing to implementation error, stability constraints  
309 reduced relative changes in ICV and risk (by as much as 26% and 59%, respectively) with  
310 increasing bias (especially in mean  $F$  estimates, Fig. 3b,c).

### 311 3.3. Alternative management measures

312 The proportion of the select grid search area evaluated through MSE that remained  
313 precautionary (safe harvest margin) progressively shrank as more bias in SSB and mean  $F$   
314 estimates was introduced (from 84% to 29% and from 90% to 37%, respectively, Fig. 4a,b and  
315 Table 2). Within the safe harvest margin, the harvest rule was projected to produce higher (by  
316 6.7–25%) short-term catches and maintain similar (<3% deviation from the baseline) long-term

317 catches under all bias scenarios (Table 2). With overestimated stock abundances, the fishery  
318 produced highest catch limits at lower (by 0.02–0.10)  $F_{target}$  and higher (by 10,000–60,000 t)  
319  $B_{trigger}$  (Table 2 and Fig. 4a). However, short- and long-term SSB and short-term ICV  
320 progressively declined with biased estimates (Table 2). Similarly, with underestimated mean  $F$ ,  
321 the fishery produced higher catches and reduced short-term ICV with lower SSB at lower  $F_{target}$   
322 and  $B_{trigger}$  (by 0.02–0.06 and 20,000 t, respectively, Table 2 and Fig. 4b).

#### 323 **4. DISCUSSION**

324 We showed that a precautionary approach applied through MSE offers a powerful decision-  
325 support tool to explicitly evaluate how robust harvest rules are to estimation bias and, when  
326 necessary, to develop alternative (reliable) measures for sustainable harvest of marine  
327 populations by simulating the entire commercial fishery system. For North Sea saithe, the current  
328 harvest rule is robust to a moderate amount (10–30%) of bias in assessments despite process,  
329 observation, and implementation uncertainties. More severe bias sets overly optimistic catch  
330 limits only in the short term; unacceptably high risks of missing management targets (quasi-  
331 extinction), however, result primarily from progressively amplified fluctuation in catch limits  
332 over time. A harvest policy tool to suppress catch fluctuation can, to some extent, mitigate these  
333 undesirable effects. More consistent, cost-effective performance—lower risk with less disruption  
334 in fishing operations (more stable catch limits)—can be achieved by developing and applying  
335 more precautionary harvest rules with lower target exploitation rate and higher threshold  
336 abundance. By explicitly accounting for key sources of uncertainty in managing commercial  
337 exploitation, this approach can provide decision makers a means to balance common trade-offs—  
338 achieving socioeconomic goals while conserving living marine resources.

339 How robust management measures are to estimation errors would depend on life history,  
340 fishing operations, and current status of a given species or population (Wiedenmann & Jensen  
341 2018). For depleted populations with a high growth rate, for example, even a modest amount of  
342 bias may incur ecological and socioeconomic damages under multiple sources of uncertainty.  
343 North Sea saithe is currently (2018) in good condition (~37% above MSY  $B_{trigger}$ , ICES 2019b);  
344 our MSE-guided analyses showed that the current harvest rule is robust up to 18%  
345 overestimation of spawner abundance and 24% underestimation of fishing pressure (when  
346 accounting for process and observation errors), which are roughly in agreement with the rule of  
347 thumb based on Mohn's  $\rho$  proposed by Hurtado-Ferro et al. (2015). Past work, however,  
348 suggests that this metric may not be consistently sensitive to retrospective patterns (Hurtado-  
349 Ferro et al. 2015; Brooks & Legault 2016; Wiedenmann & Jensen 2018). Our analyses also  
350 showed that Mohn's  $\rho$  does not reflect the magnitude of relative error (simulated-true versus  
351 perceived) in assessments, leaving certain ambiguity in its use.

352 Our simulations further revealed that managing harvest with severely biased assessments can  
353 increase the risk of quasi-extinction, but the causes of heightened risk vary over time. The risk  
354 initially increases as the population becomes depleted owing primarily to overly optimistic  
355 projections of catch limits. Although median catch limits eventually stabilize, year-to-year catch  
356 variance continues to rise (by as much as 74%) over time as the estimates of stock abundance  
357 and fishing pressure become progressively more biased, and thus, the risk remains elevated.

358 Ignorance of retrospective patterns can have time-varying consequences for managers and  
359 stakeholders; decision making misguided by erroneous assessments would produce higher yield  
360 (and thus revenues) in the short term but ultimately would amplify catch fluctuation and  
361 probabilities of depletion and quasi-extinction (and, in turn, fishery closure) in the long term.



362 Trade-offs between short-term gains and long-term losses are common dilemmas in managing  
363 natural resources (Carpenter et al. 2015). Although in-depth analyses on management measures  
364 to achieve a balance between conservation and socioeconomic targets are beyond the scope of  
365 this study, our findings reemphasize that alternative protective measures need to be explicitly  
366 assessed before implementation when providing a scientific basis to inform defensible decision  
367 making.

368 Large year-to-year fluctuation in catch forecasts is disfavored by fishing communities  
369 (Carpenter et al. 2015); thus, measures to suppress the fluctuation is commonly applied in  
370 industrial exploitation. In our saithe example, this policy tool falls short of being an effective  
371 measure to achieve conservation- and harvest-oriented goals under severe uncertainty. Although  
372 suppressing short-term catch fluctuation can attenuate catch variance inflated by underestimated  
373 fishing pressure (but not overestimated stock abundance), quasi-extinction risk remains  
374 unacceptably high under most of the bias scenarios tested. Thus, this strategy may not be  
375 sufficiently sensitive to rapid population declines under severe bias in assessments and unlikely  
376 prompts reductions in catch effectively.

377 Our analyses suggest that retrospective problems could go unnoticed for a long time as  
378 persistent overestimation of abundance can mask overharvesting and depletion, thereby delaying  
379 management responses (asynchronized resource–fishery dynamics, Fryxell et al. 2010).  
380 Although a certain lag in management responses is unavoidable, severe retrospective patterns  
381 can contribute to management inertia. Once population abundance reaches to a lower threshold  
382 ( $B_{lim}$ , for example), the population may even become unresponsive to any measure for recovery  
383 (Allee effect, Kuparinen et al. 2014). Our analyses showed that this undesirable state can be  
384 avoided by developing and applying alternative–more precautionary–harvest rules to set catch

385 limits. For saithe, when retrospective patterns become severe, lowering target exploitation rate  
386 and raising threshold abundance (that trigger management actions) would not only minimize  
387 probabilities of quasi-extinction and fishery closure but also maintain catch stability, thereby  
388 minimizing disruption in fishing operations. Thus, this approach would support cost-effective  
389 decision making to safeguard against ecologically and socioeconomically undesirable outcomes  
390 of managing risks under systematic uncertainty.

391 We showed that MSE offers a precautionary solution to retrospective problems in assessments  
392 and management of exploited populations. MSE can not only act as a diagnostic tool to evaluate  
393 the robustness of management measures by explicitly accounting for long-term consequences but  
394 also provide an adaptive, transparent approach to develop alternative protective measures when  
395 the perception deviates too far from the reality. Given ubiquity of estimation errors and  
396 challenges in identifying the sources (Hurtado-Ferro et al. 2015; Brooks & Legault 2016;  
397 Szuwalski et al. 2017), we suggest retrospective patterns be routinely evaluated through MSE as  
398 an additional source of uncertainty, and alternative measures be developed to set catch limits  
399 when the uncertainty becomes too severe.

400 Our proposed approach also has limitations. Analyses showed that our ability to safely harvest  
401 marine resources would become progressively limited (less margin of error in setting the  
402 precautionary harvest rules or “safe operating space”, Anderies et al. 2019) as the magnitude of  
403 retrospective patterns increases. Thus, continued efforts to develop methods to identify root  
404 causes of the uncertainty (such as temporal variability in life-history traits, Hurtado-Ferro et al.  
405 2015; Szuwalski et al. 2017) are needed.

406 Demand for wild-capture fisheries, which provide food, nutrition, and job security, will  
407 continue to rise with growing human populations in the coming decades (Costello et al. 2020).

408 Furthermore, changing ocean conditions are projected to increase environmental stochasticity,  
409 amplifying marine population and harvest fluctuation (Brooks & Legault 2016). Higher  
410 environmental stochasticity may also promote autocorrelation in population fluctuation (Ripa &  
411 Lundberg 1996; Gamelon et al. 2019) and amplify the magnitude of scientific uncertainty  
412 (thereby further shrinking safe harvest margins). These anticipated issues underscore greater  
413 needs for taking precautionary measures in shaping resilient management policies to safeguard  
414 shared living resources in the face of rising uncertainty.

#### 415 **ACKNOWLEDGEMENTS**

416 We thank all participants of the ICES Workshop of North Sea Management Strategies  
417 Evaluation (WKNSMSE) for feedback on the saithe MSE work. We also thank anonymous  
418 reviewers for comments on earlier versions of the manuscript. Some figures use images from the  
419 IAN Symbols, courtesy of the Integration and Application Network, University of Maryland  
420 Center for Environmental Science ([ian.umces.edu/symbols/](http://ian.umces.edu/symbols/)). This project was partially funded  
421 by Institute of Marine Research's REDUS (Reduced Uncertainty in Stock Assessments) project.

#### 422 **AUTHORS' CONTRIBUTIONS**

423 J.A.A.D., D.H., and D.G. conceived the ideas; J.A.A.D., D.H., S.H.F., I.U., E.J., I.M., J.A.D.,  
424 and D.G. designed methodology; J.A.D. and D.G. analyzed and interpreted the data; D.G. led the  
425 writing of the manuscript. All authors contributed critically to the drafts and gave final approval  
426 for publication.

#### 427 **REFERENCES**

428 Anderies JM, Mathias J-D, Janssen MA. 2019. Knowledge infrastructure and safe operating  
429 spaces in social–ecological systems. *Proceedings of the National Academy of Sciences*  
430 **116**:5277-5284.

- 431 Beddington JR, Agnew DJ, Clark CW. 2007. Current problems in the management of marine  
432 fisheries. *Science* **316**:1713-1716.
- 433 Brooks EN, Legault CM. 2016. Retrospective forecasting—evaluating performance of stock  
434 projections for New England groundfish stocks. *Canadian Journal of Fisheries and Aquatic  
435 Sciences* **73**:935-950.
- 436 Bunnefeld N, Hoshino E, Milner-Gulland EJ. 2011. Management strategy evaluation: a powerful  
437 tool for conservation? *Trends in Ecology & Evolution* **26**:441-447.
- 438 Butterworth D, Punt A. 1999. Experiences in the evaluation and implementation of management  
439 procedures. *ICES Journal of Marine Science* **56**:985-998.
- 440 Carpenter SR, Brock WA, Folke C, Van Nes EH, Scheffer M. 2015. Allowing variance may  
441 enlarge the safe operating space for exploited ecosystems. *Proceedings of the National  
442 Academy of Sciences* **112**:14384-14389.
- 443 CBD. 2010. The strategic plan for biodiversity 2011–2020 and the Aichi Biodiversity Targets.  
444 COP 10 Decision X/2. CBD, Montreal, Canada.
- 445 Charles AT. 1998. Living with uncertainty in fisheries: analytical methods, management  
446 priorities and the Canadian groundfishery experience. *Fisheries Research* **37**:37-50.
- 447 Costello C, Cao L, Gelcich S, Cisneros-Mata MÁ, Free CM, Froehlich HE, Golden CD,  
448 Ishimura G, Maier J, Macadam-Somer I. 2020. The future of food from the sea. *Nature*:1-6.
- 449 Deroba JJ. 2014. Evaluating the consequences of adjusting fish stock assessment estimates of  
450 biomass for retrospective patterns using Mohn's Rho. *North American Journal of Fisheries  
451 Management* **34**:380-390.
- 452 FAO. 1996. Precautionary approach to capture fisheries and species introductions. FAO  
453 Technical Guidelines for Responsible Fisheries 2, FAO.

- 454 Fryxell JM, Packer C, McCann K, Solberg EJ, Sæther B-E. 2010. Resource management cycles  
455 and the sustainability of harvested wildlife populations. *Science* **328**:903-906.
- 456 Gamelon M, Sandercock BK, Sæther BE. 2019. Does harvesting amplify environmentally  
457 induced population fluctuations over time in marine and terrestrial species? *Journal of Applied*  
458 *Ecology* **56**:2186-2194.
- 459 Hilborn R, Amoroso RO, Anderson CM, Baum JK, Branch TA, Costello C, de Moor CL, Faraj  
460 A, Hively D, Jensen OP. 2020. Effective fisheries management instrumental in improving fish  
461 stock status. *Proceedings of the National Academy of Sciences*.
- 462 Hilborn R, Maguire J-J, Parma AM, Rosenberg AA. 2001. The precautionary approach and risk  
463 management: can they increase the probability of successes in fishery management? *Canadian*  
464 *Journal of Fisheries and Aquatic Sciences* **58**:99-107.
- 465 Hordyk AR, Huynh QC, Carruthers TR. 2019. Misspecification in stock assessments: Common  
466 uncertainties and asymmetric risks. *Fish and Fisheries* **20**:888-902.
- 467 Hurtado-Ferro F, Szuwalski CS, Valero JL, Anderson SC, Cunningham CJ, Johnson KF,  
468 Licandeo R, McGilliard CR, Monnahan CC, Muradian ML. 2015. Looking in the rear-view  
469 mirror: bias and retrospective patterns in integrated, age-structured stock assessment models.  
470 *ICES Journal of Marine Science* **72**:99-110.
- 471 ICES. 2016. Report of the Benchmark Workshop on North Sea Stocks (WKNSEA), 14–18  
472 March 2016, Copenhagen, Denmark, ICES CM 2016/ACOM:37 704 pp.
- 473 ICES. 2018. Report of the Working Group on the Assessment of Demersal Stocks in the North  
474 Sea and Skagerrak (WGNSSK), 24 April - 3 May 2018, Oostende, Belgium. ICES CM  
475 2018/ACOM:22. 1264 pp.

- 476 ICES. 2019a. Workshop on north sea stocks management strategy evaluation (WKNSMSE),  
477 ICES Scientific Reports. 1:12. 378 pp.
- 478 ICES. 2019b. Report of the Interbenchmark Protocol on North Sea Saithe. (IBPNSsaithe). ICES  
479 Scientific Reports. VOL 1:ISS 1. 65 pp.
- 480 ICES. 2019c. Workshop on guidelines for management strategy evaluations (WKG MSE2). ICES  
481 Scientific Reports. 1:33. 162 pp.
- 482 ICES. 2020a. Workshop on Catch Forecast from Biased Assessments (WKFORBIAS). ICES  
483 Scientific Reports. 2:28. 38 pp.
- 484 ICES. 2020b. Workshop on Management Strategy Evaluation of Mackerel (WKMSEMAC).  
485 ICES Scientific Reports. 2:74. 175 pp.
- 486 Kell LT, Mosqueira I, Grosjean P, Fromentin J-M, Garcia D, Hillary R, Jardim E, Mardle S,  
487 Pastoors M, Poos J. 2007. FLR: an open-source framework for the evaluation and development  
488 of management strategies. *ICES Journal of Marine Science* 64:640-646.
- 489 Kuparinen A, Keith DM, Hutchings JA. 2014. Allee effect and the uncertainty of population  
490 recovery. *Conservation Biology* **28**:790-798.
- 491 Memarzadeh M, Britten GL, Worm B, Boettiger C. 2019. Rebuilding global fisheries under  
492 uncertainty. *Proceedings of the National Academy of Sciences* **116**:15985-15990.
- 493 Milner-Gulland E, Shea K, Possingham H, Coulson T, Wilcox C. 2001. Competing harvesting  
494 strategies in a simulated population under uncertainty. Pages 157-167. *Animal Conservation*  
495 forum. Cambridge University Press.
- 496 Mohn R. 1999. The retrospective problem in sequential population analysis: an investigation  
497 using cod fishery and simulated data. *ICES Journal of Marine Science* **56**:473-488.

- 498 Nielsen A, Berg CW. 2014. Estimation of time-varying selectivity in stock assessments using  
499 state-space models. *Fisheries Research* **158**:96-101.
- 500 Ovaskainen O, Meerson B. 2010. Stochastic models of population extinction. *Trends in Ecology*  
501 *& Evolution* **25**:643-652.
- 502 Patterson K, Cook R, Darby C, Gavaris S, Kell L, Lewy P, Mesnil B, Punt A, Restrepo V,  
503 Skagen DW. 2001. Estimating uncertainty in fish stock assessment and forecasting. *Fish and*  
504 *Fisheries* **2**:125-157.
- 505 Punt AE, Butterworth DS, de Moor CL, De Oliveira JA, Haddon M. 2016. Management strategy  
506 evaluation: best practices. *Fish and Fisheries* **17**:303-334.
- 507 Punt AE, Tuck GN, Day J, Canales CM, Cope JM, de Moor CL, De Oliveira JAA, Dickey-  
508 Collas M, Elvarsson BP, Haltuch MA. 2020. When are model-based stock assessments  
509 rejected for use in management and what happens then? *Fisheries Research* **224**:105465.
- 510 Regan HM, Ben-Haim Y, Langford B, Wilson WG, Lundberg P, Andelman SJ, Burgman MA.  
511 2005. Robust decision-making under severe uncertainty for conservation management.  
512 *Ecological Applications* **15**:1471-1477.
- 513 Rindorf A, Cardinale M, Shephard S, De Oliveira JA, Hjørleifsson E, Kempf A, Luzencyk A,  
514 Millar C, Miller DC, Needle CL. 2016. Fishing for MSY: can “pretty good yield” ranges be  
515 used without impairing recruitment. *ICES Journal of Marine Science*.
- 516 Ripa J, Lundberg P. 1996. Noise colour and the risk of population extinctions. *Proceedings of the*  
517 *Royal Society of London. Series B: Biological Sciences* **263**:1751-1753.
- 518 Sethi SA. 2010. Risk management for fisheries. *Fish and Fisheries* **11**:341-365.
- 519 Szuwalski CS, Ianelli JN, Punt AE. 2017. Reducing retrospective patterns in stock assessment  
520 and impacts on management performance. *ICES Journal of Marine Science* **75**:596-609.

- 521 UN. 2015. Transforming our world: the 2030 Agenda for Sustainable Development A/RES/70/1,  
522 Available from <https://sustainabledevelopment.un.org/post2015/transformingourworld>  
523 (accessed 26 September 2020).
- 524 Walters C, Maguire J-J. 1996. Lessons for stock assessment from the northern cod collapse.  
525 *Reviews in Fish Biology and Fisheries* **6**:125-137.
- 526 Wiedenmann J, Jensen OP. 2018. Uncertainty in stock assessment estimates for New England  
527 groundfish and its impact on achieving target harvest rates. *Canadian Journal of Fisheries and*  
528 *Aquatic Sciences* **75**:342-356.
- 529



## Tables

Table 1. Summary statistics of performance metrics from North Sea saithe management strategy evaluation under the baseline scenario of three harvest rules evaluated in this study (HCR-A, HCR-A+D, and HCR-A1+D).

| harvest rule     | OM <sup>a</sup> |        |        |        | EM <sup>a</sup> |        |        |        | relative error |       |        | Mohn's $\rho$ |        |       |        |       |
|------------------|-----------------|--------|--------|--------|-----------------|--------|--------|--------|----------------|-------|--------|---------------|--------|-------|--------|-------|
|                  | median          | SD     | 5th    | 95th   | median          | SD     | 5th    | 95th   | median         | Sd    | 5th    | 95th          | median | SD    | 5th    | 95th  |
| SSB <sup>a</sup> |                 |        |        |        |                 |        |        |        |                |       |        |               |        |       |        |       |
| HCR-A            | 277556          | 104612 | 150732 | 482385 | 267070          | 101053 | 152967 | 474471 | -0.022         | 0.278 | -0.359 | 0.507         | 0.007  | 0.043 | -0.066 | 0.074 |
| HCR-A+D          | 216907          | 104455 | 81966  | 419176 | 221793          | 100485 | 80162  | 411952 | -0.010         | 0.467 | -0.467 | 0.844         | 0.008  | 0.047 | -0.072 | 0.076 |
| HCR-A1+D         | 265121          | 100132 | 142147 | 460374 | 256608          | 96271  | 144700 | 454235 | -0.017         | 0.293 | -0.358 | 0.538         | 0.008  | 0.041 | -0.065 | 0.069 |
| mean $F^a$       |                 |        |        |        |                 |        |        |        |                |       |        |               |        |       |        |       |
| HCR-A            | 0.339           | 0.143  | 0.155  | 0.604  | 0.340           | 0.130  | 0.173  | 0.574  | -0.019         | 0.551 | -0.476 | 1.062         | -0.010 | 0.081 | -0.123 | 0.143 |
| HCR-A+D          | 0.339           | 0.143  | 0.155  | 0.604  | 0.340           | 0.130  | 0.173  | 0.574  | -0.019         | 0.551 | -0.476 | 1.062         | -0.012 | 0.080 | -0.123 | 0.138 |
| HCR-A1+D         | 0.348           | 0.162  | 0.152  | 0.658  | 0.340           | 0.145  | 0.171  | 0.619  | -0.020         | 0.821 | -0.550 | 1.432         | -0.013 | 0.076 | -0.116 | 0.137 |

<sup>a</sup>SSB, mean  $F$ , OM, and EM indicate spawning stock biomass, mean fishing mortality rates of 4- to 7- year-olds, the population operating model, and the estimation model, respectively.

Table 2. Optimized parameters ( $F_{target}$  and  $B_{trigger}$ )<sup>a</sup> of the harvest rule set for North Sea saithe (HCR-A) and performance metrics<sup>b</sup> from management strategy evaluation under scenarios of varying levels of assessment bias.

| scenario <sup>c</sup> | $F_{target}$ | $B_{trigger}$ | short-term |      |        |                   | long-term |      |        |                   |                  |
|-----------------------|--------------|---------------|------------|------|--------|-------------------|-----------|------|--------|-------------------|------------------|
|                       |              |               | catch      | IAV  | SSB    | risk <sup>d</sup> | catch     | IAV  | SSB    | risk <sup>d</sup> | SHM <sup>e</sup> |
| base                  | 0.35         | 250000        | 92464      | 20.4 | 251973 | 2.0               | 116700    | 17.7 | 292067 | 1.5               | -                |
| 10% $N$               | 0.33         | 250000        | 101786     | 13.3 | 238194 | 3.2               | 116288    | 17.8 | 279135 | 2.5               | 84.4             |
| 20% $N$               | 0.31         | 270000        | 103545     | 12.5 | 235356 | 3.3               | 116154    | 18.7 | 274958 | 3.0               | 65.6             |
| 30% $N$               | 0.27         | 310000        | 93047      | 20.0 | 252123 | 2.2               | 115984    | 18.0 | 293711 | 2.2               | 53.1             |
| 40% $N$               | 0.26         | 310000        | 101131     | 13.8 | 240643 | 2.9               | 115863    | 18.4 | 282929 | 2.5               | 37.5             |
| 50% $N$               | 0.25         | 310000        | 104943     | 12.2 | 234525 | 3.3               | 115730    | 19.1 | 274228 | 2.8               | 29.2             |
| 10% $F$               | 0.35         | 230000        | 103441     | 12.3 | 234493 | 3.3               | 116897    | 17.5 | 272497 | 2.9               | 89.6             |
| 20% $F$               | 0.33         | 230000        | 102882     | 12.6 | 235089 | 3.3               | 117221    | 16.9 | 273309 | 3.0               | 76.0             |
| 30% $F$               | 0.32         | 230000        | 104840     | 11.7 | 230922 | 3.6               | 117677    | 17.1 | 267727 | 3.6               | 62.5             |
| 40% $F$               | 0.30         | 230000        | 103894     | 11.9 | 232210 | 3.5               | 118376    | 16.5 | 269327 | 3.5               | 51.0             |
| 50% $F$               | 0.29         | 230000        | 105721     | 11.1 | 227980 | 4.1               | 118942    | 17.0 | 262836 | 4.2               | 36.5             |

<sup>a</sup>The model parameters were optimized at the highest median catch while risk remains  $\leq 5\%$ .

<sup>b</sup>The performance was evaluated with short-term (years 1–5) and long-term (years 11–20) median catch (t), interannual catch variability (%), IAV), median spawning stock biomass (SSB, t), and risk (%).

<sup>c</sup>Scenarios simulate overestimation of abundance ( $N$ ) and underestimation of fishing mortality rate ( $F$ ).

<sup>d</sup>Risk is the maximum probability of SSB falling below  $B_{lim}$  (107,297 t) over a given period.

<sup>e</sup>Safe harvest margin (SHM) indicates the proportion of the grid-search area with the harvest rules that remain precautionary (Fig. 4).

## Figures legends

Figure 1. Management strategy evaluation (MSE) framework and historical population and harvest dynamics of North Sea saithe. (a) schematic of the MSE framework (FLR/a4a, redrawn from E. Jardim, <https://github.com/ejardim>) adopted for evaluation of saithe management strategies. (b) three harvest control rules (HCR-A, HCR-A+D, and HCR-A1+D) evaluated in this study. (c) reconstructed saithe population and harvest dynamics taken from the 2018 assessment. In b, blue dashed (horizontal and vertical) lines indicate the harvest rule parameters (reference points) set for saithe ( $F_{target}$  and  $B_{trigger}$ , respectively).

Figure 2. Short-term (years 1–5) performance of management strategies (a) HCR-A, (b) HCR-A+D, and (c) HCR-A1+D for North Sea saithe under scenarios (11) of varying levels of estimation bias (overestimation of stock abundance and underestimation of fishing mortality rate). The performance was evaluated with median catch (t), interannual catch variability (ICV, %), median spawner abundance (SSB, t), and risk. Risk is the maximum probability of SSB falling below  $B_{lim}$  (107,297 t). Violin plots indicate frequency distributions of performance metrics. Horizontal lines (from bottom to top) within the box plots indicates the 25th, 50th, and 75th percentiles; whiskers extend to the largest and smallest values within 1.5x the inter-quartile range (IQR) from the box edges; and black circles indicate the outliers. Red horizontal lines indicate median values from the baseline scenario (SSB, catch, and ICV) or the precautionary threshold (risk = 0.05).

Figure 3. Long-term (years 11–20) performance of management strategies (a) HCR-A, (b) HCR-A+D, and (c) HCR-A1+D for North Sea saithe under scenarios (11) of varying levels of estimation bias (overestimation of stock abundance and underestimation of fishing mortality rate). See Fig. 2 for more details.

Figure 4. Grid search for combination of the decision model (harvest rule, HCR-A) parameters ( $F_{target}$  and  $B_{trigger}$ ) for North Sea saithe under scenarios (11) of varying levels of estimation bias (overestimation of stock abundance and underestimation of fishing mortality rate). Heat maps indicate median catch for only combinations that meet the precautionary criterion (risk  $\leq 5\%$ ) in the long term (years 11–20). Black rectangles indicate combinations of the model parameters with the highest median catch.

**Figures**  
Figure 1.

(a)

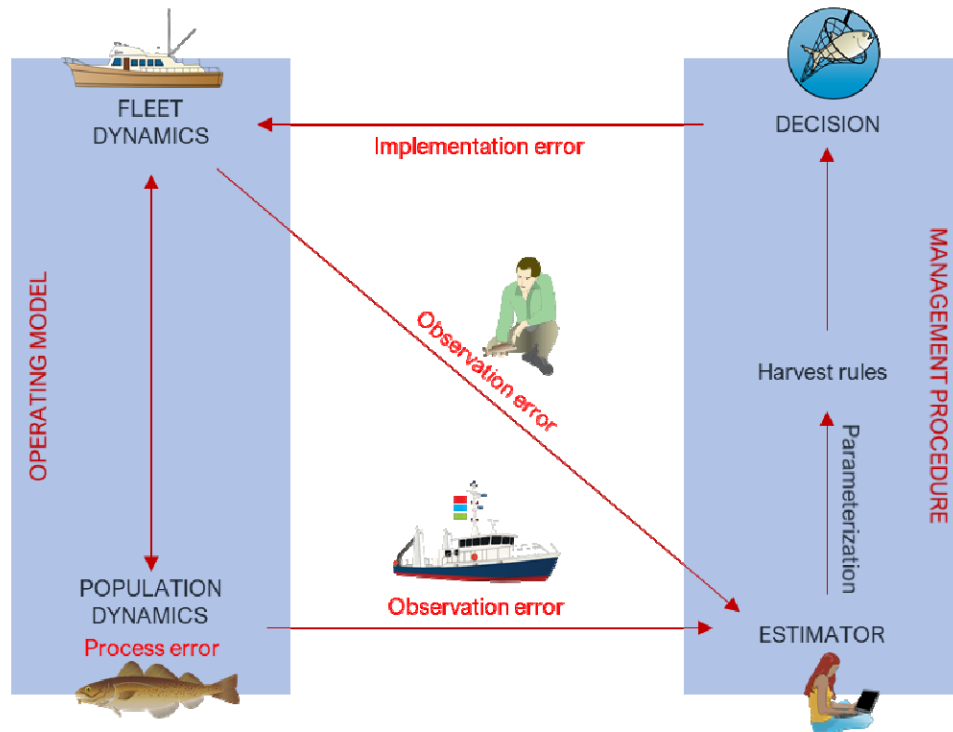

(b)

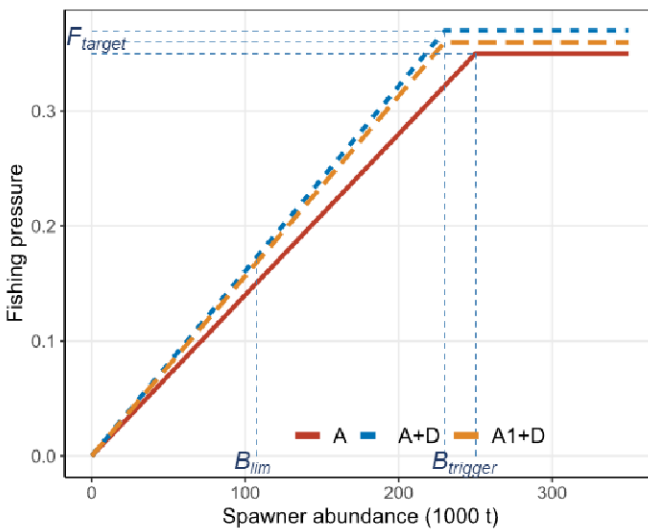

(c)

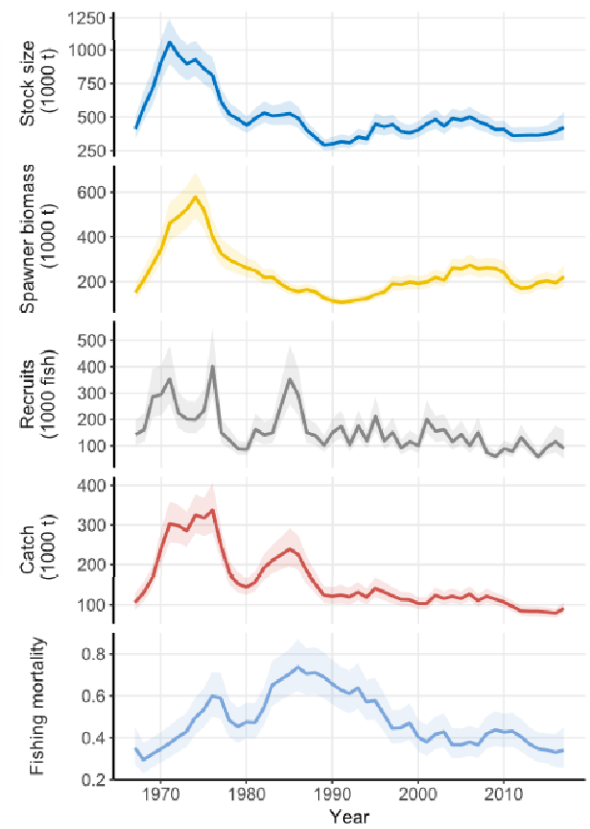

Figure 2.

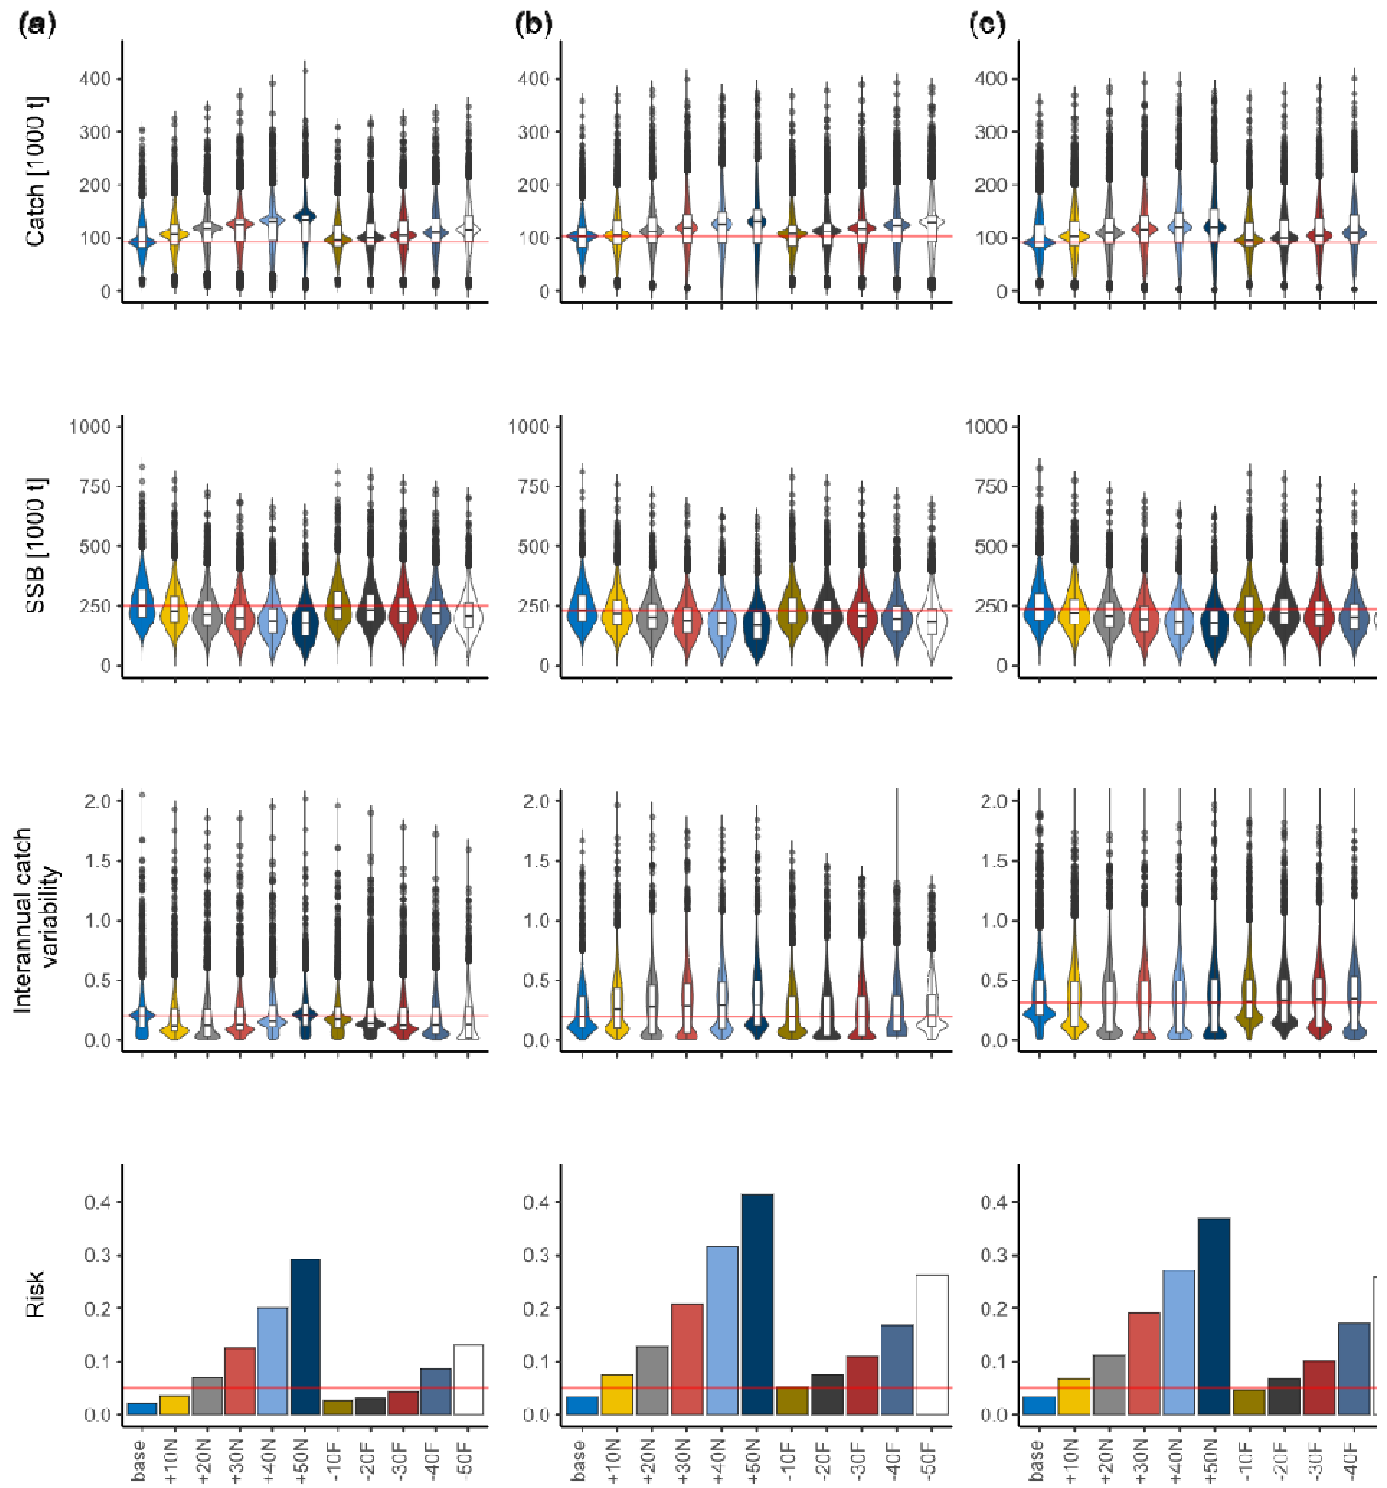

Figure 3.

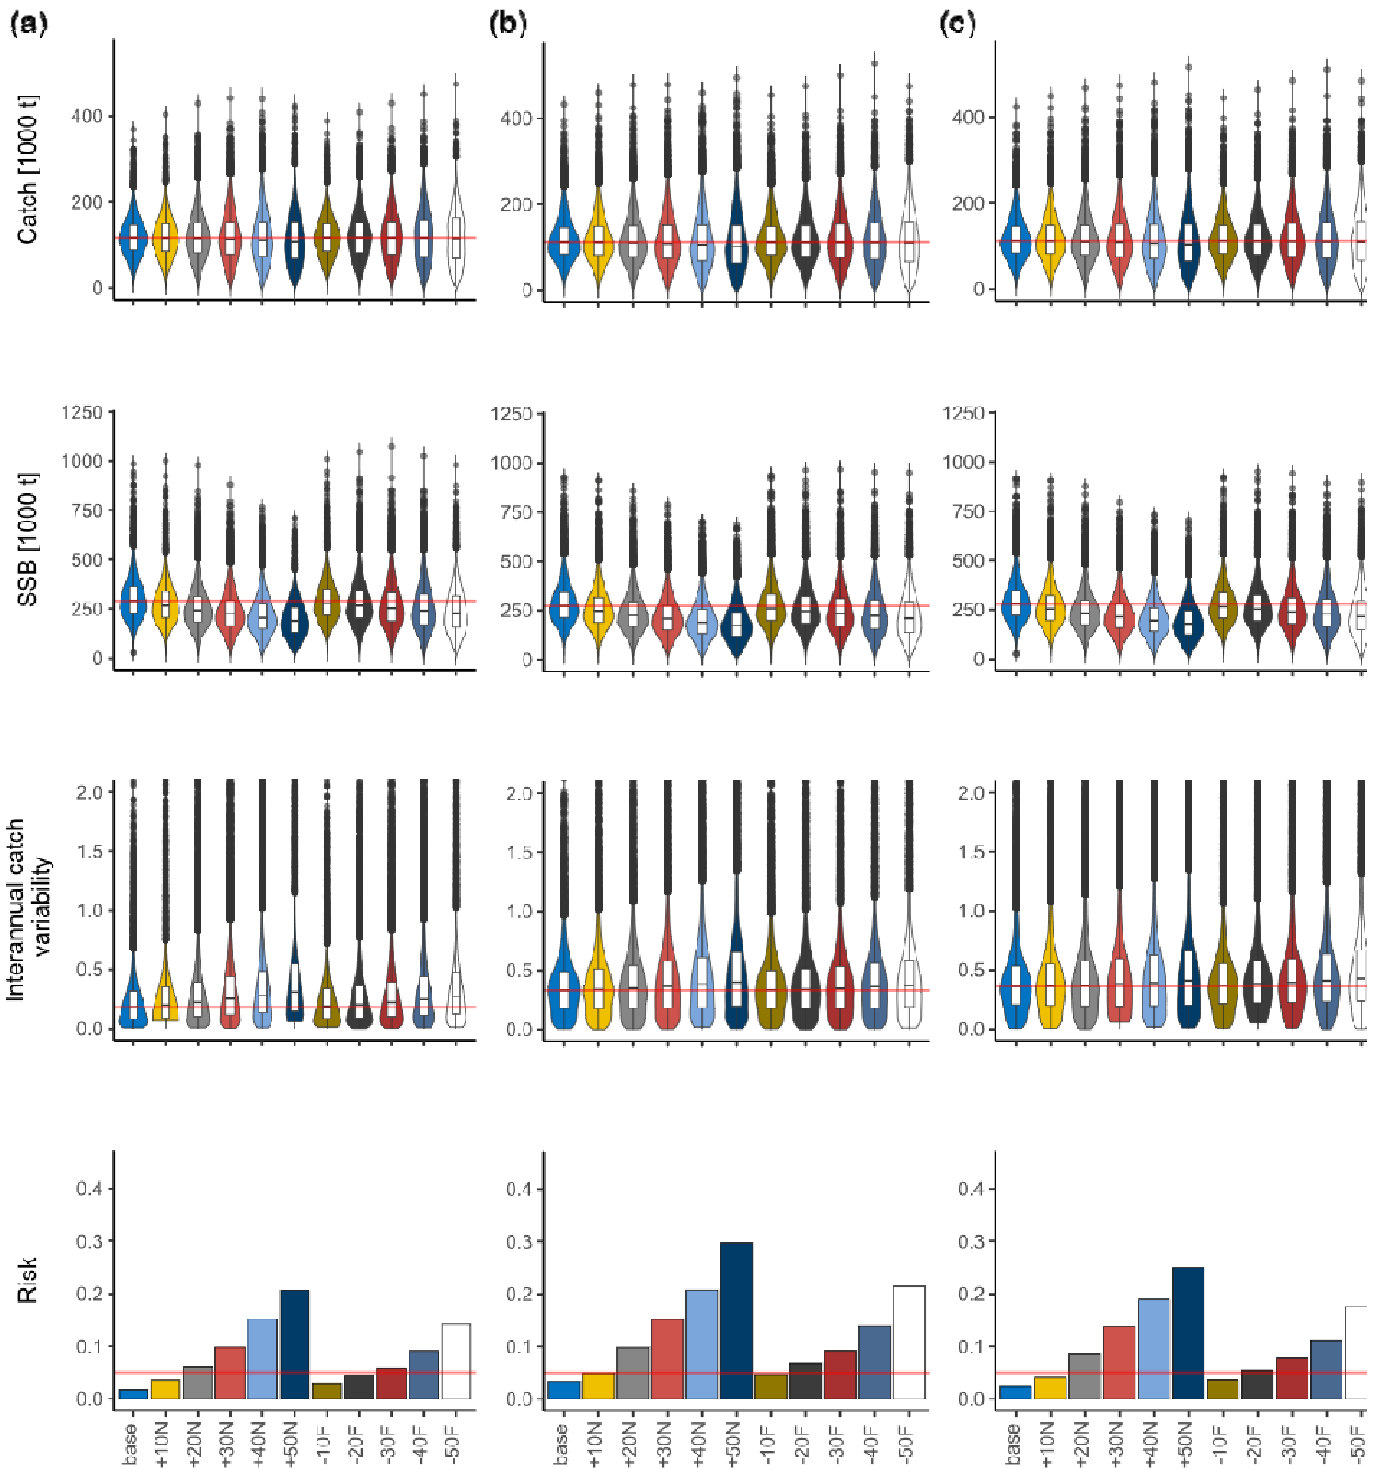

Figure 4.

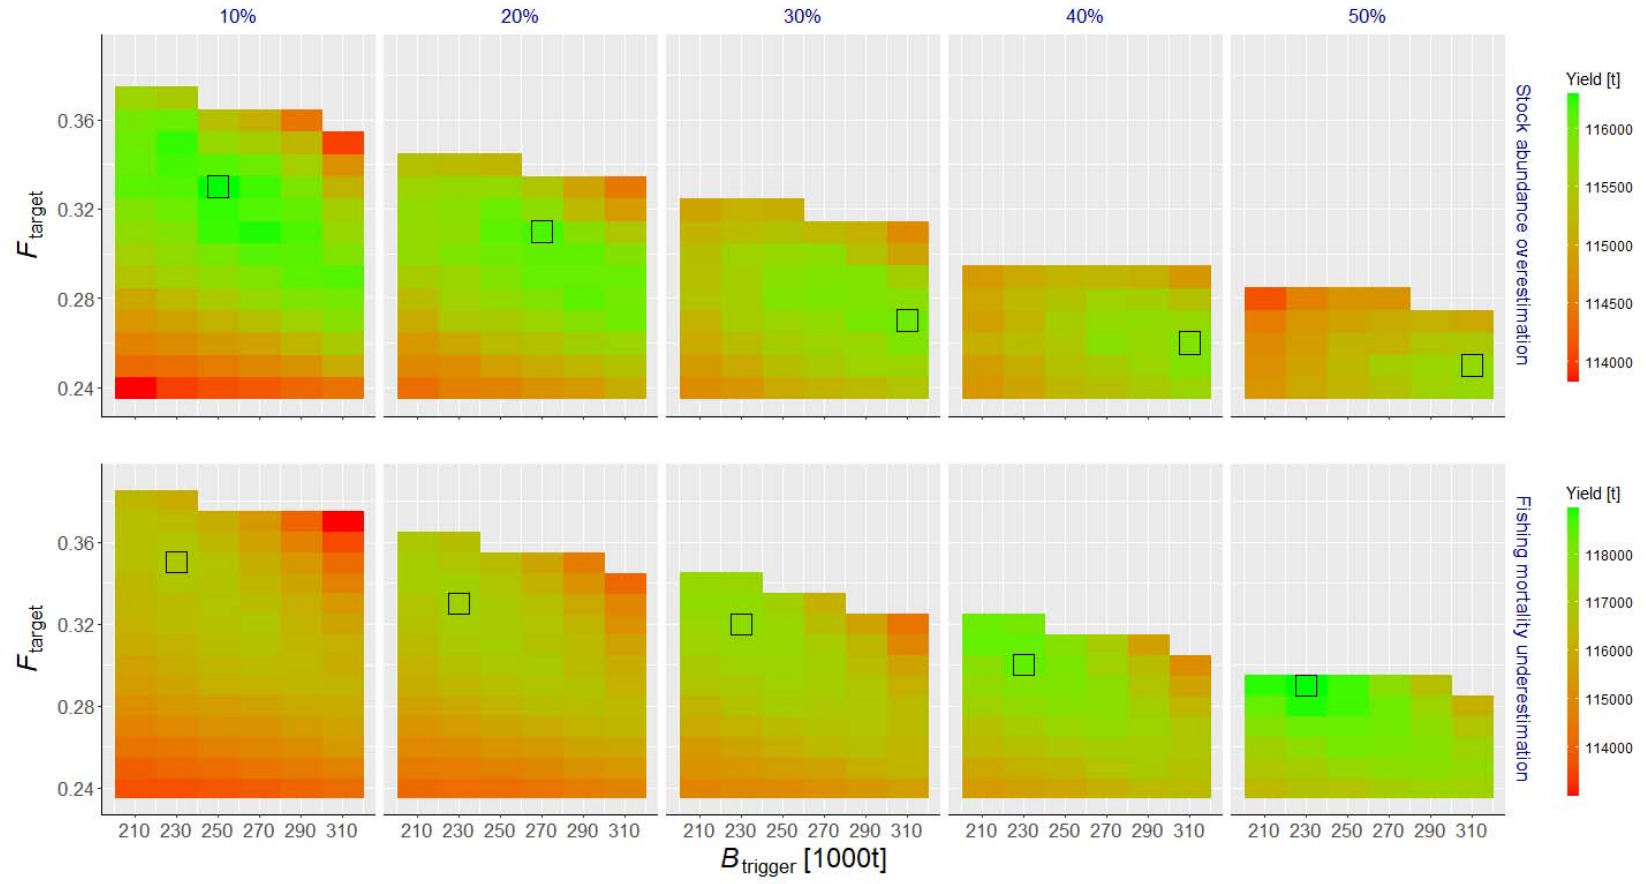

Source: https://biorxiv.org/content/10.1101/2020.12.05.413070v1.full.pdf
